# Supplementary material for: Sapitinib: reactive intermediates and bioactivation pathways characterized by LC-MS/MS
Source: Royal Society of Chemistry journal article supplement (doi:10.1039/c9ra03926k), 2019-01-01
Supplement: c9ra03926k1.pdf [file c9ra03926k1.pdf]

## Supplementary data

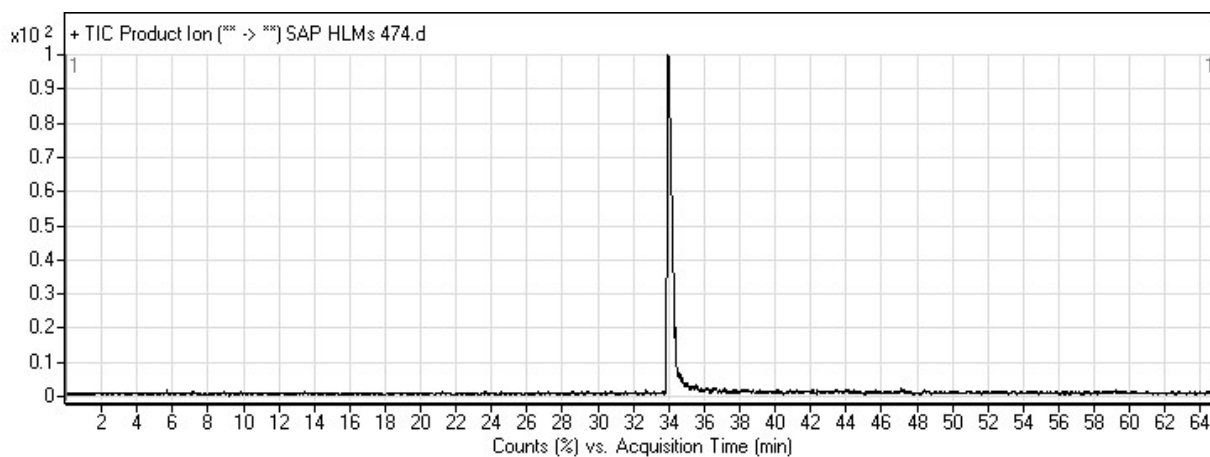

**Fig. S1.** SAP PI chromatogram.  
SAP, sapitinib; PI, product ion.

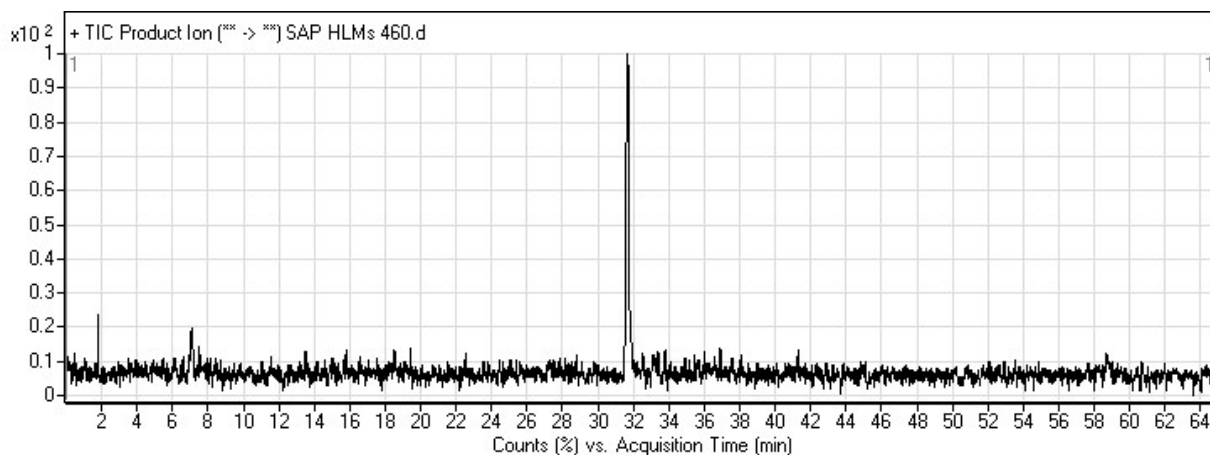

**Fig. S2.** M1 PI chromatogram.

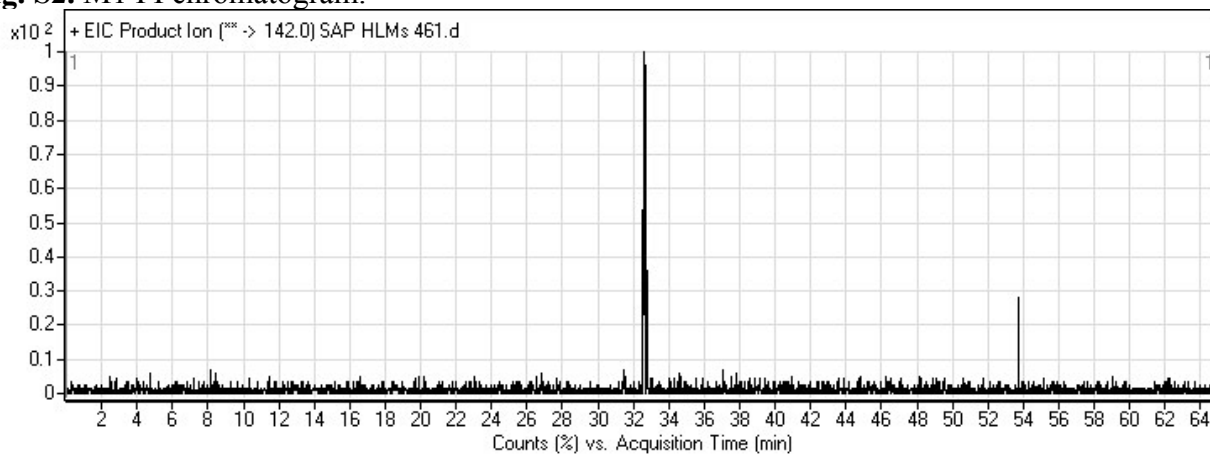

**Fig. S3.** M2 PI chromatogram.

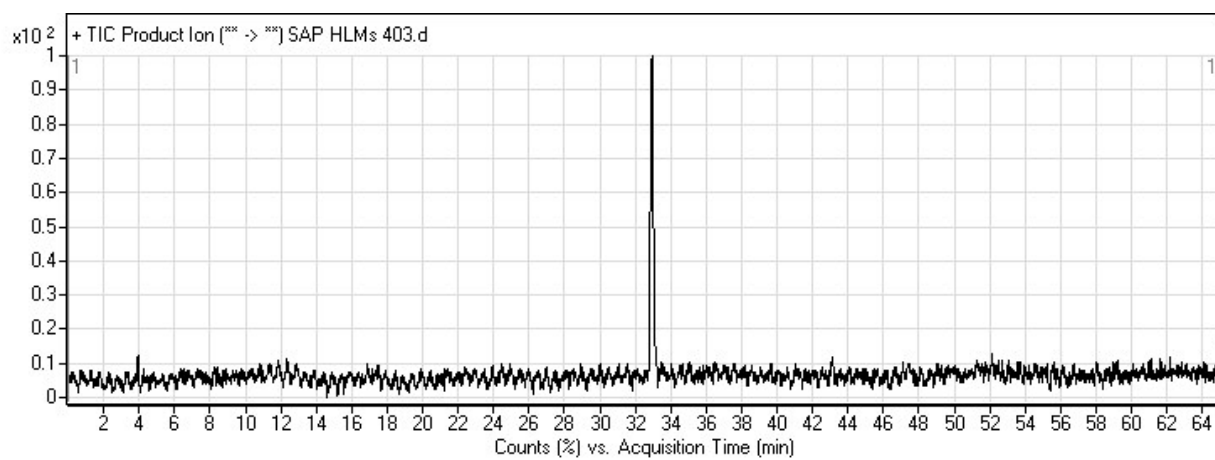

**Fig. S4.** M3 PI chromatogram.

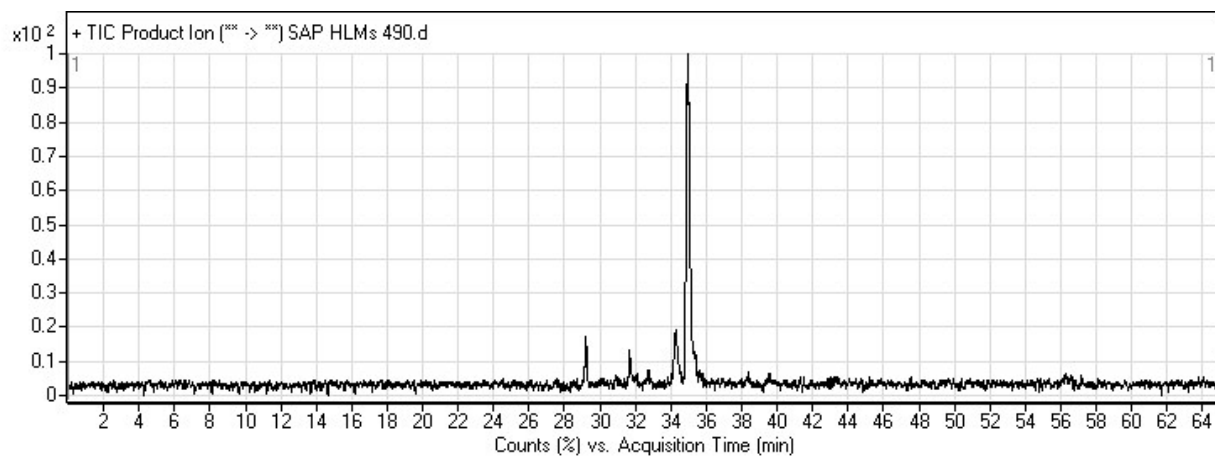

**Fig. S5.** M4, M5 and M6 PI chromatogram.

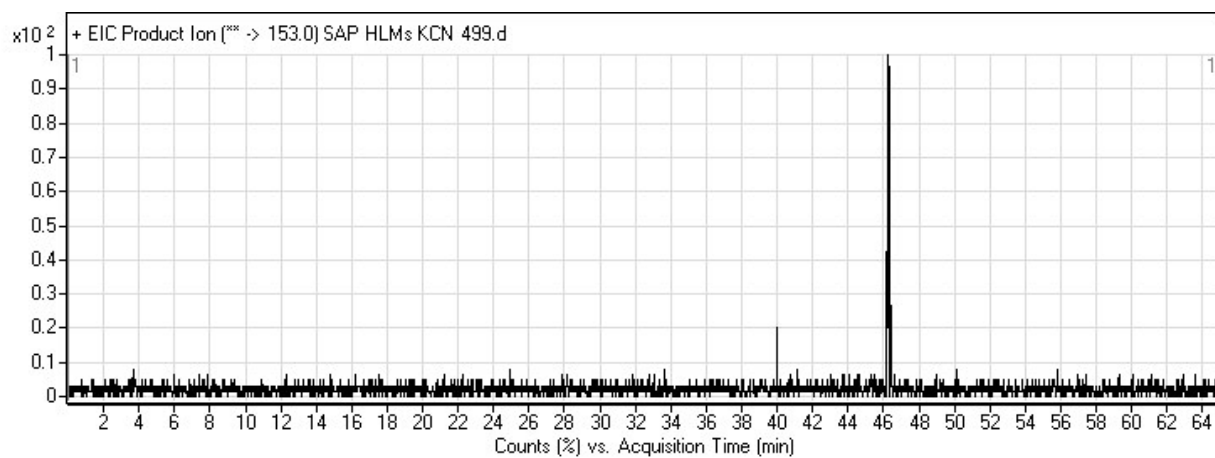

**Fig. S6.** M7 PI chromatogram.

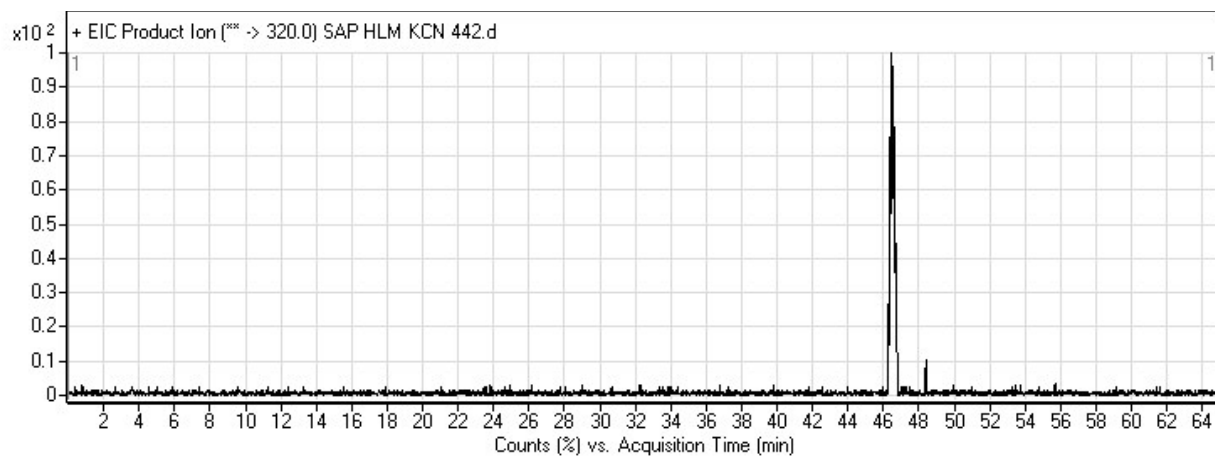

**Fig. S7.** M8 PI chromatogram.

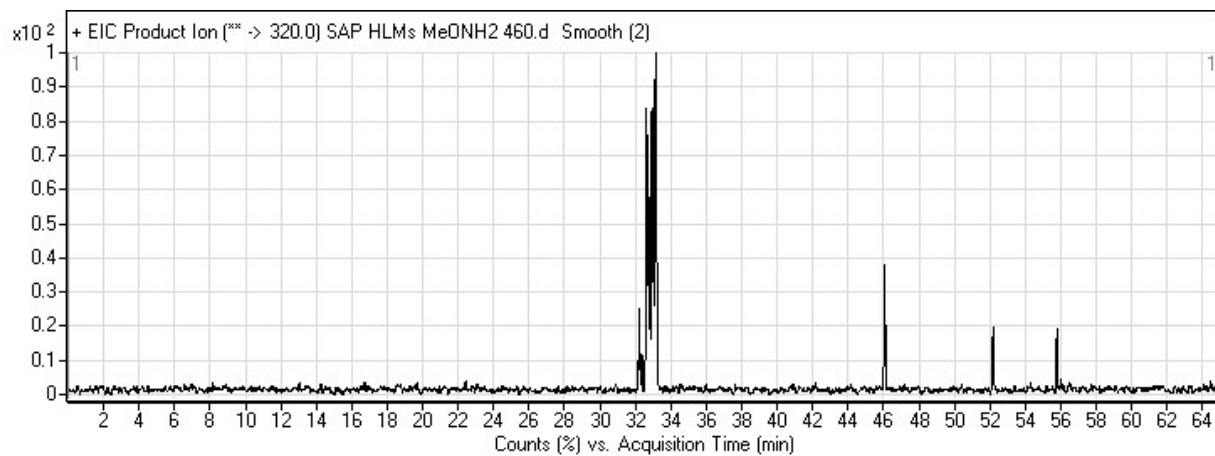

**Fig. S8.** M9 PI chromatogram.
